# Supplementary material
Source: HighWire-hosted journal article supplement (https://bmjopen.bmj.com/content/15/5/e095341)
Supplement: inline-supplementary-material-3 [file inline-supplementary-material-3.pdf]

**Supplementary file Table S2;** Examples of the decontextualization process with meaning units, condensed meanings and codes. Followed by the recontextualization process with subcategories and categories.

| Meaning units                                                                                                                        | Condensed meaning                                              | Code                                                                 | Subcategories                                                      | Categories                                                        |
|--------------------------------------------------------------------------------------------------------------------------------------|----------------------------------------------------------------|----------------------------------------------------------------------|--------------------------------------------------------------------|-------------------------------------------------------------------|
| important to talk and ask questions about everything without being offended                                                          | talk and asking question about everything                      | Having respect,<br>Create confidence,<br>Acting helpful              | Building mutual respect by offering and receiving support.         | Creating a safe atmosphere when working in an unknown environment |
| at the ER it is even worse, everyone asks who you are, and you need to reorganize the roles and positions every time                 | different places, unknown colleagues, new people and positions | The right time and place,<br>Create new teams,<br>Unknown tasks      | Managing emotions and tasks in familiar and unfamiliar situations. |                                                                   |
| when collaboration works, everyone knows what to do and when, and everything just smoothly “cogs”                                    | know what to do and when                                       | Master different tasks,<br>Complement each other,<br>Professionalism | Being surrounded by expertise that improves team performance.      | Counteracting and mitigating destructive team dynamics            |
| someone who screams and is very aggressive in a situation, so I get perverse towards that person, thinking what the ...are you doing | someone who screams and is aggressive                          | Working in conflicts,<br>Disharmony,<br>Disputes                     | Conflicts in the team jeopardizing teamwork.                       |                                                                   |
